# Supplementary material for: Persistence of Smoking-Induced Dysregulation of MiRNA Expression in the Small Airway Epithelium Despite Smoking Cessation
Source: PubMed Central journal article supplement (PMC4401720; doi:10.1371/journal.pone.0120824), 2015-04-17
Supplement: pone.0120824.s006.pdf [file pone.0120824.s006.pdf]

**S1 Table. TaqMan microRNA Assays Used to Validate the Microarray Data<sup>1</sup>**

| <b>microRNA</b> | <b>TaqMan MicroRNA assay catalog number</b> |
|-----------------|---------------------------------------------|
| miR-181a        | 000480                                      |
| miR-449b        | 001408                                      |
| miR-143         | 002249                                      |
| miR-634         | 001576                                      |
| miR-133b        | 002247                                      |
| miR-133a        | 002246                                      |
| miR-1226 star   | 002758                                      |
| miR-487b        | 001285                                      |
| miR-1260        | 002896                                      |
| miR-550         | 002410                                      |
| miR-1246        | 462575_mat                                  |
| miR-218         | 000521                                      |
| miR-1246        | 462575_mat                                  |
| miR-224 star    | 121210_mat                                  |
| RNU6B           | 001093                                      |

<sup>1</sup> Life Technologies, Grand Island, NY
