# Supplementary material for: Persistence of Smoking-Induced Dysregulation of MiRNA Expression in the Small Airway Epithelium Despite Smoking Cessation
Source: PubMed Central journal article supplement (PMC4401720; doi:10.1371/journal.pone.0120824), 2015-04-17
Supplement: pone.0120824.s007.pdf [file pone.0120824.s007.pdf]

**S2 Table. Functional Categories of Smoking-dependent microRNAs<sup>1,2</sup>**

| <b>Function category</b>             | <b>microRNAs</b>                                                          |
|--------------------------------------|---------------------------------------------------------------------------|
| <b>Up-regulated miRNAs</b>           |                                                                           |
| miRNA tumor suppressor               | miR-181a, miR-181b, miR-181c, miR-127, miR-145, miR-143, miR-195, miR-126 |
| Inflammation                         | miR-199a, miR-133a, miR-143, miR-126, miR-181a                            |
| Human embryonic stem cell regulation | miR-181a, miR-126, miR-199a, miR-214, miR-145, miR-143, miR-195           |
| Cell differentiation                 | miR-145, miR-143, miR-127                                                 |
| HIV latency                          | miR-143, miR-126, miR-127                                                 |
| <b>Down-regulated miRNAs</b>         |                                                                           |
| Inflammation                         | miR-203, miR-146a, miR-449b                                               |
| Immune response                      | miR-203, miR-146a, miR-449b                                               |
| Onco-miRNAs                          | miR-203, miR-146a                                                         |
| Human embryonic stem cell regulation | miR-203, miR-146a, miR-218                                                |
| Apoptosis                            | miR-146a, miR-449b                                                        |

<sup>1</sup> miRNA functional category was analyzed (before December, 2012) by “Tool for annotations of meaningful human miRNAs categories” (TAM; <http://202.38.126.151/hmdd/tools/tam.html>).

<sup>2</sup> See Table III in the main text for more information.
