# Supplementary material for: Persistence of Smoking-Induced Dysregulation of MiRNA Expression in the Small Airway Epithelium Despite Smoking Cessation
Source: PubMed Central journal article supplement (PMC4401720; doi:10.1371/journal.pone.0120824), 2015-04-17
Supplement: pone.0120824.s008.pdf [file pone.0120824.s008.pdf]

**S3 Table. Top 10 Canonical Pathways Used by the Target Genes of the Smoking Cessation Persistent miRNAs**

| <b>Ingenuity canonical pathways<sup>1</sup></b> | <b>p value<sup>2</sup></b> | <b>Ratio<sup>3</sup><br/>(%)</b> | <b>Target genes of the smoking cessation persistent miRNAs in the given pathway<sup>4</sup></b>                                                                                                                                                                                                                                                                                                                                        |
|-------------------------------------------------|----------------------------|----------------------------------|----------------------------------------------------------------------------------------------------------------------------------------------------------------------------------------------------------------------------------------------------------------------------------------------------------------------------------------------------------------------------------------------------------------------------------------|
| Wnt/ $\beta$ -catenin signaling                 | $10^{-9}$                  | 24                               | TCF4,SFRP2,TGFBR1,WNT10B,CSNK1G1,PPP2CA,PPP2R2A,TGFBR3,MARK2,LRP6,SOX12,BCL9,CCND1,TCF7,CSNK1E,RARA,RARB,TGFB2,WNT4,GSK3B,CSNK2B,SOX5,SOX4,AXIN2,APPL2,CSNK1G3,PPP2R5D,WNT2B,CREBBP,ACVR1B,PPP2R5A,FZD8,PPP2CB,CDH2,FZD4,WNT3A,SOX6,PPP2R4,BTRC,DVL3,PPP2R5E                                                                                                                                                                           |
| Cardiac $\beta$ -adrenergic signaling           | $10^{-8}$                  | 21                               | AKAP12,PPP1CC,PDE7A,PPP2R2A,PPP2CA,PDE3A,PDE12,PPP1CB,ATP2A2,AKAP11,GNB1,GNB4,ADRB1,ADCY5,ADCY9,CACNA1D,PDE10A,ADRBK2,PPP2R5D,ADCY6,AKAP6,PPP1R11,GNG3,PPP2R5A,PDE8A,PPP2CB,AKAP2/PALM2,AKAP2,PRKAR2B,PPP2R4,PRKACA,PDE8B,PPP2R5E,AKAP9                                                                                                                                                                                                |
| Protein kinase A signaling                      | $10^{-7}$                  | 16                               | TGFBR1,MAPK1,NFATC3,PDE12,PDE3A,CREB5,TCF7,GNB1,GNB4,PTPRO,ADCY5,DUSP7,GSK3B,ADCY9,YWHAG,YWHAZ,PDE10A,PTCH1,CREBBP,YWHAZ,PPP1R11,PLCL2,GNG3,PTPN3,PTP4A1,PTPRM,PDE8A,PTPN11,PRKACA,PTPRA,CAMK2G,AKAP12,PPP1CC,TCF4,PDE7A,PPP1CB,AKAP11,DUSP5,NFAT5,CREB1,TGFB2,PRKCE,PRKCA,PXN,PTPRK,MAP3K1,ADCY6,PLCG1,AKAP6,NFATC1,GNAI2,GNAI3,CALM1,AKAP2/PALM2-<br>AKAP2,PTPRU,PRKAR2B,FLNC,CDC14B,PDE8B,SFN,ELK1,EYA1,AKAP9,PTPRT,DUSP16          |
| IGF-1 signaling                                 | $10^{-7}$                  | 25                               | SOCS3,CTGF,MAPK1,PIK3R1,SOCS6,PDPK1,PIK3CG,IGF1R,CSNK2B,RPS6KB1,PXN,NRAS,YWHAG,PIK3C2A,YWHAZ,GRB2,YWHAZ,SOCS4,PRKAR2B,PTPN11,IRS1,PRKACA,ELK1,SOCS7,SFN,SOCS5                                                                                                                                                                                                                                                                          |
| ERK5 signaling                                  | $10^{-7}$                  | 31                               | RPS6KB1,YWHAG,NRAS,YWHAZ,SGK1,CREBBP,RPS6KA3,YWHAZ,CREB5,RPS6KA6,GAB1,PTPN11,MEF2D,CREB1,MEF2C,SFN,MAP3K3,ELK4,MAP3K2,EGFR                                                                                                                                                                                                                                                                                                             |
| Axonal guidance signaling                       | $10^{-6}$                  | 15                               | WNT10B,MAPK1,ITSN1,NFATC3,PIK3R1,UNC5B,ARPC5,SEMA6B,SEMA4F,BRCC3,GNB1,GNB4,SUFU,PIK3CG,WNT4,PLXNB2,SRGAP2,GSK3B,EPHA7,KALRN,CRKL,SEMA5A,PTCH1,GNG3,PLCL2,SRGAP3,PTPN11,PRKACA,GNAL,NRP1,ADAM17,RGS3,ARPC1B,SEMA6A,CRK,PLXNA2,ROBO1,EIF4E,EFNB2,NFAT5,MYSM1,PLXNA1,SDC2,EFNB1,MKNK1,PRKCE,PFN2,RASSF5,SHANK2,PRKCA,TUBB1,EPHB4,PXN,NRAS,PLXNC1,ARHGEF12,NRP2,PIK3C2A,GRB2,WNT2B,PLCG1,NFATC1,GNAI2,GNAI3,SEMA3A,FZD8,PRKAR2B,FZD4,WNT3A |

**S3 Table. Top 10 Canonical Pathways Enriched in the Target Genes of the Smoking Cessation Persistent miRNAs (cont., page 2)**

| <b>Ingenuity canonical pathways<sup>1</sup></b> | <b>p value<sup>2</sup></b> | <b>Ratio<sup>3</sup> (%)</b> | <b>Target genes of the smoking cessation persistent miRNAs in the given pathway<sup>4</sup></b>                                                                                                                                                |
|-------------------------------------------------|----------------------------|------------------------------|------------------------------------------------------------------------------------------------------------------------------------------------------------------------------------------------------------------------------------------------|
| ERK/MAPK signaling                              | 10 <sup>-6</sup>           | 18                           | PPP1CC,MAPK1,PPP2R2A,PPP2CA,PIK3R1,ETS2,PPP1CB,CRK,CREB5,EIF4E,ELF3,PIK3CG,MKNK1,CREB1,PRKCE,PRKCA,ETS1,PXN,YWHAG,NRAS,PIK3C2A,GRB2,PPP2R5D,CRKL,CREBBP,YWHAZ,PLCG1,NFATC1,PPP1R11,PPP2R5A,PPP2CB,ELF2,PRKAR2B,ARAF,PPP2R4,PRKACA,PPP2R5E,ELK1 |
| Insulin receptor signaling                      | 10 <sup>-6</sup>           | 21                           | SOCS3,PPP1CC,MAPK1,SGK1,PIK3R1,PDPK1,PPP1CB,CRK,STXBP4,EIF4E,PIK3CG,GSK3B,SCNN1B,RPS6KB1,NRAS,PIK3C2A,GRB2,CRKL,PPP1R11,VAMP2,PRKAR2B,RHOQ,CBL,PTPN11,SYNJ1,GAB1,IRS1,ASIC1,PRKACA,INSR                                                        |
| B cell receptor signaling                       | 10 <sup>-6</sup>           | 19                           | MAP2K4,GAB2,MAPK1,NFATC3,POU2F2,PIK3R1,PDPK1,CREB5,NFAT5,PIK3CG,CREB1,GSK3B,MAP3K2,ETS1,RPS6KB1,NRAS,PIK3C2A,GRB2,MAP3K13,CREBBP,MAP3K1,NFATC1,BCL2L1,CALM1 (includes others),PTPN11,SYNJ1,GAB1,VAV3,PAG1,PIK3AP1,ELK1,MAP3K3,CAMK2G           |

<sup>1</sup> The pathway analysis was performed in Ingenuity pathway analysis software. The target genes of the 12 smoking cessation persistent miRNAs were used. See methods for detail. The pathways were ranked by p value.

<sup>2</sup> Fisher's exact test.

<sup>3</sup> Number of target genes in a given pathway divided by total number of genes that make up that pathway.

<sup>4</sup> Only target genes of the smoking cessation persistent miRNAs in a given pathway were shown.
